# Supplementary material for: Mechanisms of Surfactin from Bacillus subtilis SF1 against Fusarium foetens: A Novel Pathogen Inducing Potato Wilt
Source: MDPI journal article supplement (doi:10.3390/jof9030367), 2023-03-17
Supplement: s1 [file s1]

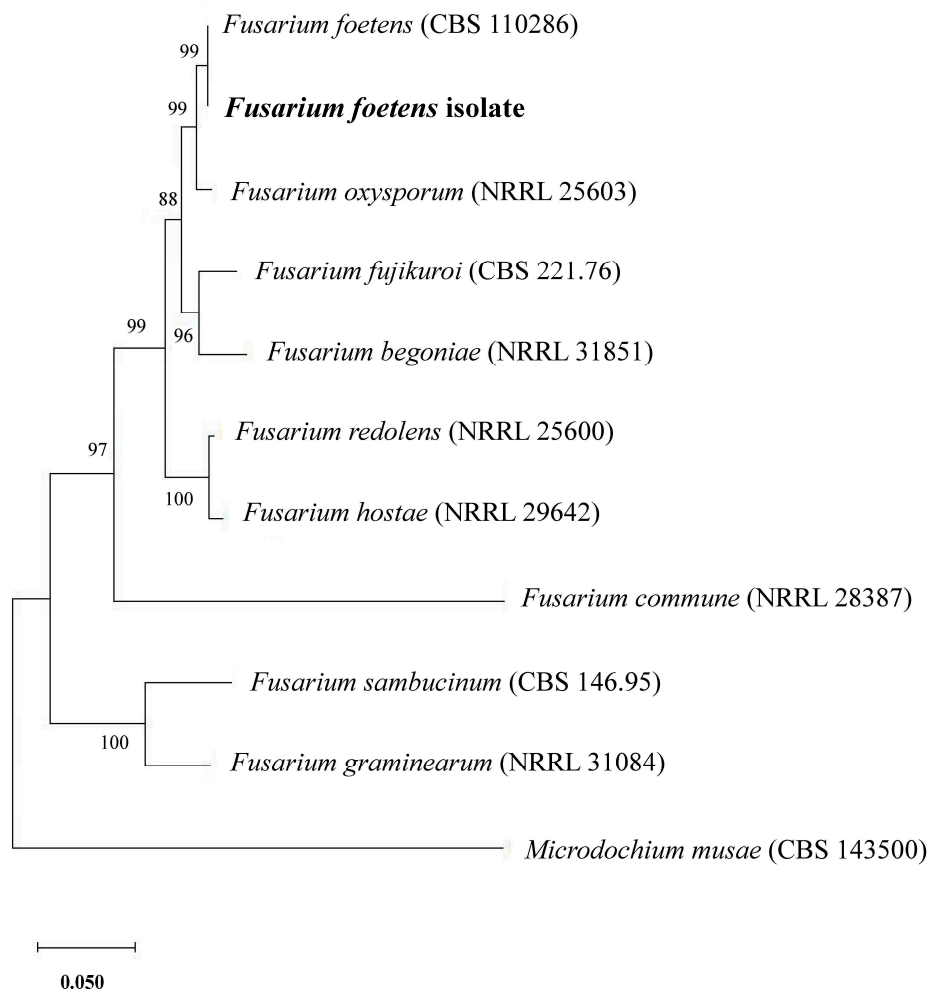

**Figure S1.** Phylogenetic tree inferred from the combined dataset of EF-1  $\alpha$  and  $\beta$ -tubulin based on the Neighbor-Joining method. *Fusarium foetens* isolate is the pathogen of potato wilt described in the study. The scale bar indicates genetic distance. Bootstrap values in 1000 replicates for major lineages at the nodes were shown as percentages.

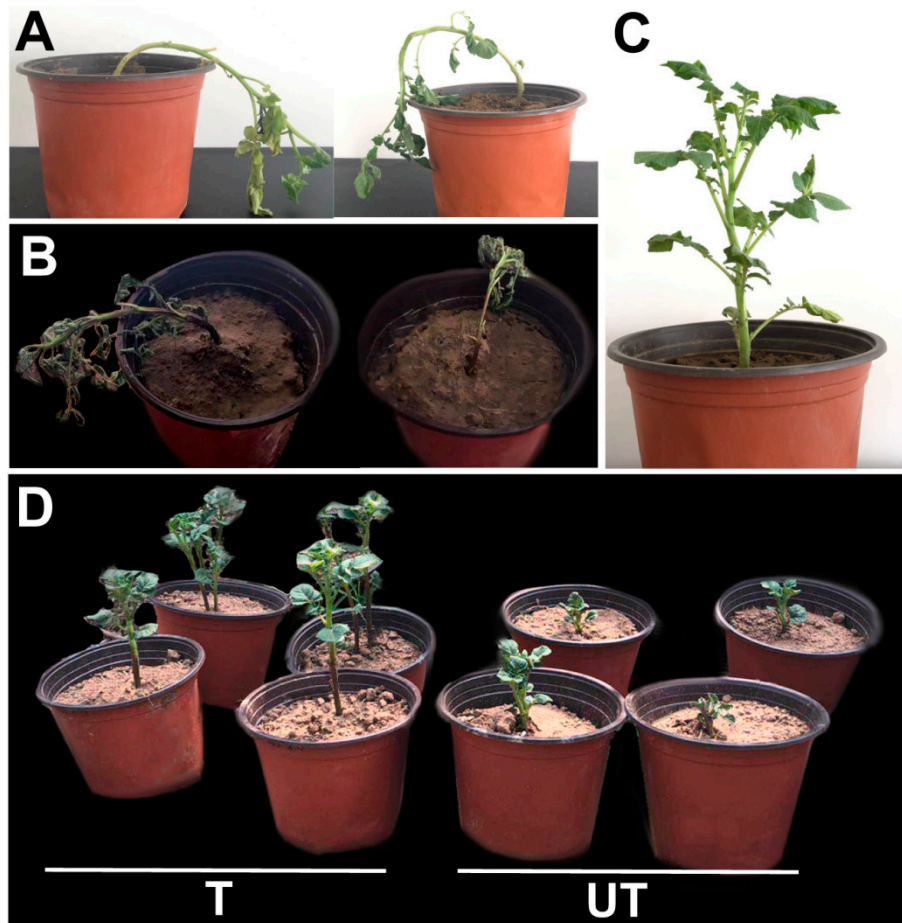

**Figure S2.** The effect of *B. subtilis* SF1 on the potato FW induced by *F. foetens*. **(A)** Seedlings inoculated with *F. foetens* cultured in pots put in the field for 9 days. **(B)** Seedlings inoculated with *F. foetens* cultured in pots put in the field for 2 weeks. **(C)** Healthy seedling. **(D)** Effect of *B. subtilis* SF1 on potato plants growth. The seedlings were transplanted into the pots with and without spores suspension of *B. subtilis* SF1 and then cultured in the greenhouse for 20 days. **(T)** the seedlings in the pots supplemented with 100 ml of spores suspension of *B. subtilis* SF1. **(UT)** the seedlings without any treatment.

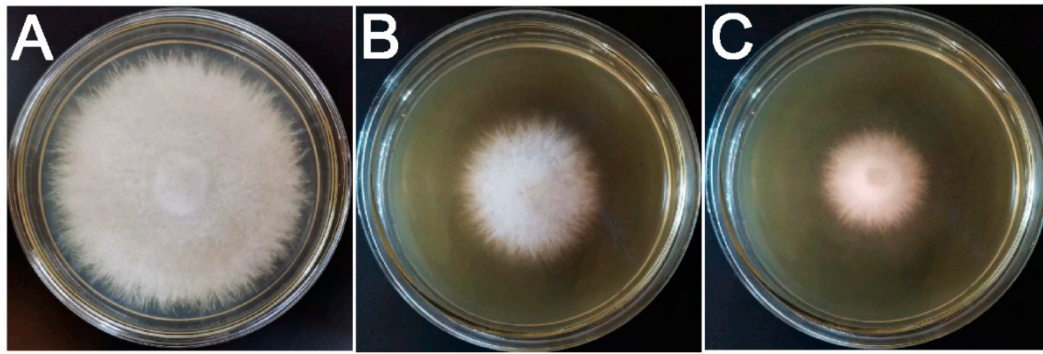

**Figure S3.** Effects of heat treatment on the antifungal activity of *B. subtilis* SF1 against *F. foetens*. The culture was incubated for 7 days at 25 °C. **(A)** Control: *F. foetens* on PDA. **(B)** *F. foetens* on PDA, replacing water by heated culture filtrate (105 °C for 10 min). **(C)** *F. foetens* on PDA supplemented with *B. subtilis* SF1 culture filtrate without heat treatment.

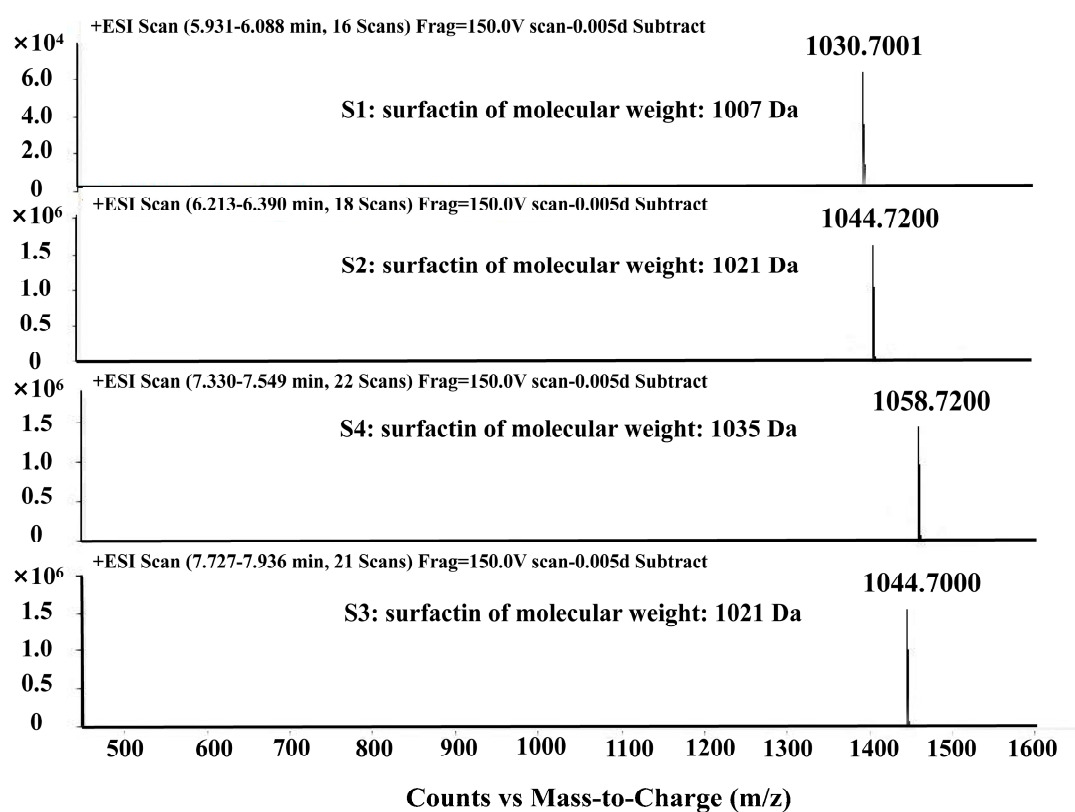

**Figure S4.** LC-MS spectrometry analysis of surfactin produced by *B. subtilis* SF1. The positive-ion MS spectrum of surfactin yielded the expected ion of  $[M+Na]^+$  at m/z 1030 (S1), 1044 (S2), 1044(S3), and 1058 (S4), with molecular weights of 1007, 1021, 1021, and 1035 Da.

**Table S1.** The genes encoding beta-glucanase, endo-1,4-beta-glucanase, and extracellular protease in the genome of *B. subtilis* SF1.

| Gene        | Protein                            | Position        | Description                                                     |
|-------------|------------------------------------|-----------------|-----------------------------------------------------------------|
| <i>eglS</i> | endo-1,4-beta glucanase EglS       | 988,650-990,149 | Hydrolytic activity against carboxymethylcellulose              |
| <i>bglS</i> | beta-glucanase                     | 835,782-836,510 | Hydrolyze beta-glucans such as lichenan or barley beta-glucan   |
| <i>nprE</i> | neutral metalloprotease NprE       | 586,981-588,546 | Neutral metalloprotease                                         |
| <i>epr</i>  | protease Epr                       | 762,622-764,559 | Serine protease                                                 |
| <i>vpr</i>  | serine protease Vpr                | 728,750-731,170 | Fibrinolytic enzyme, a serine protease of the subtilisin family |
| <i>bpr</i>  | bacillopeptidase F                 | 646,231-650,532 | Serine proteinase with esterolytic activity                     |
| <i>wprA</i> | cell wall-associated protease WprA | 203,965-206,649 | Subtilisin protease family                                      |

**Table S2.** Representative genes involved in plant growth promotion in the genome of *B. subtilis* SF1.

| Gene             | Position               | Description                                |
|------------------|------------------------|--------------------------------------------|
| <i>spo0A</i>     | 1,433,063 to 1,433,866 | Biofilm formation                          |
| <i>sigW</i>      | 424,349 to 424,912     | Biofilm formation                          |
| <i>sinR</i>      | 1,467,687 to 1,468,028 | Biofilm formation                          |
| <i>sinI</i>      | 1,467,659 to 1,467,486 | Biofilm formation                          |
| <i>abrB</i>      | 45,441 to 45,725       | Biofilm formation                          |
| <i>resE</i>      | 1,332,210 to 1,330,441 | Biofilm formation                          |
| <i>lytS</i>      | 1,887,433 to 1,885,652 | Biofilm formation                          |
| <i>ybdK</i>      | 397,849 to 396,863     | Biofilm formation                          |
| <i>ycbA</i>      | 355,282 to 356,634     | Biofilm formation                          |
| <i>EpsA to O</i> | 332,476 to 348,216     | Necessary for biofilm formation            |
| <i>yqxM to</i>   | 1,468,121 to 1,470,287 | Essential for biofilm formation            |
| <i>tasA</i>      | 354,374 to 355,795     | Root adhesion                              |
| <i>sacB</i>      | 1,453,155 to 1,453,712 | Essential for swarming motility            |
| <i>efp</i>       | 764,229 to 764,732     | Essential for swarming motility            |
| <i>swrB</i>      | 441,011 to 441,346     | Essential for swarming motility            |
| <i>swrA</i>      | 204,256 to 207,414     | Self-resistance against surfactin          |
| <i>swrC</i>      | 74,898 to 77,141       | Regulator of surfactin production          |
| <i>comP</i>      | 218,867 to 245,015     | Necessary for surface motility and biofilm |
| <i>srfABCD</i>   | 213,097 to 213,744     | formation                                  |
| <i>yczE</i>      | 214,523 to 213,849     | Necessary for surface motility and biofilm |
| <i>sfp</i>       | 127,632 to 130,324     | formation                                  |
| <i>escABC</i>    | 615,368 to 615,817     | Necessary for surface motility and biofilm |

---

|                |                    |                                           |
|----------------|--------------------|-------------------------------------------|
| <i>ylbF</i>    | 821,321 to 821,752 | formation                                 |
| <i>ymcA</i>    | 26,810 to 28,000   | Protein secretion to extracellular matrix |
| <i>tuf</i>     | 452,303 to 453,799 | Control of community development          |
| <i>fliD</i>    | 454,379 to 455,293 | Control of community development          |
| <i>hag</i>     | 457,637 to 459,160 | Elicitation of plant basal defence        |
| <i>flgK</i>    | 468,046 to 478,310 | Elicitation of plant basal defence        |
| <i>tuaA to</i> |                    | Elicitation of plant basal defence        |
| <i>tagO</i>    |                    | Elicitation of plant basal defence        |
|                |                    | Elicitation of plant basal defence        |

---

**Table S3.** The predicted secondary metabolites and the corresponding synthesis gene clusters in the genome of *B. subtilis* SF1.

| Metabolite    | Gene cluster          | Size    | Position     | Bioactive spectrum      |
|---------------|-----------------------|---------|--------------|-------------------------|
| Surfactin     | <i>srfABCD, ycxA,</i> | 31.9 Kb | 2,736,952    | Mycoplasma, fungi,      |
|               | <i>sfp, yczE</i>      |         | to 2,768,870 | virus and tumor         |
| Pilpastatin   | <i>ppsABCDE</i>       | 37.7 Kb | 1,429,921    | Bacteria and fungi      |
|               |                       |         | to 2,768,870 |                         |
| Bacilysin     | <i>bacABCDEFG</i>     | 6.7 Kb  | 3,657,315    | Bacteria and            |
|               |                       |         | to 3,664,002 | <i>Candida albicans</i> |
| Bacillaene    | <i>pksABCFGHIJKLM</i> | 77.9 Kb | 1,250,587    | Bacteria                |
|               | <i>NRS,acpK</i>       |         | to 1,328,470 |                         |
| Bacillibactin | <i>dhbBCEF</i>        | 2.6 Kb  | 3,076,306    | Microbial competitors   |
|               |                       |         | to 3,078,940 |                         |
|               | <i>albABCDEFG</i>     | 6.7 Kb  | 3,625,712    | Bacteria                |
| Sublitolin    |                       |         | to 3,632,518 |                         |
